# Supplementary material for: Role of structural dimensionality in the magneto-chiral dichroism of chiral molecular ferrimagnets
Source: Royal Society of Chemistry journal article supplement (doi:10.1039/d2tc01777f), 2022-01-01
Supplement: d2tc01777f1.pdf [file d2tc01777f1.pdf]

# **Role of Structural Dimensionality in Magneto-Chiral Dichroism Intensity of Chiral Molecular Ferrimagnets**

Matteo Atzori,\* Ivan Breslavetz, Kevin Paillot, Geert L. J. A. Rikken and Cyrille Train

Laboratoire National des Champs Magnétiques Intenses (LNCMI), Univ. Grenoble Alpes,  
INSA Toulouse, Univ. Toulouse Paul Sabatier, EMFL, CNRS, (F-38042) Grenoble, France

## **Corresponding Author**

\*E-mail: [matteo.atzori@lncmi.cnrs.fr](mailto:matteo.atzori@lncmi.cnrs.fr)

## **SUPPLEMENTARY INFORMATION**

## Powder X-ray Diffraction Analysis

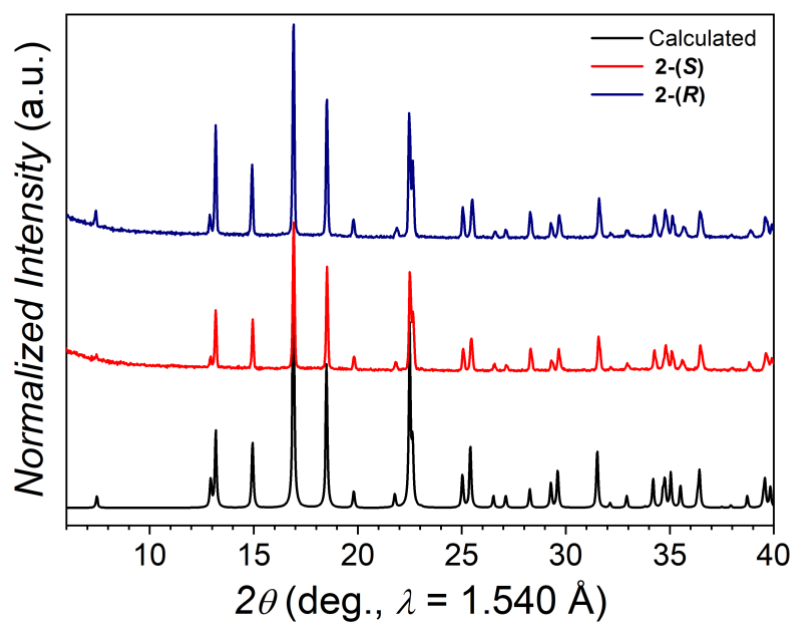

**Figure S1.** Experimental PXRD patterns for **2-(R)** and **2-(S)** compared to that calculated from atomic coordinates retrieved by single-crystal X-ray diffraction.

## Optical Images

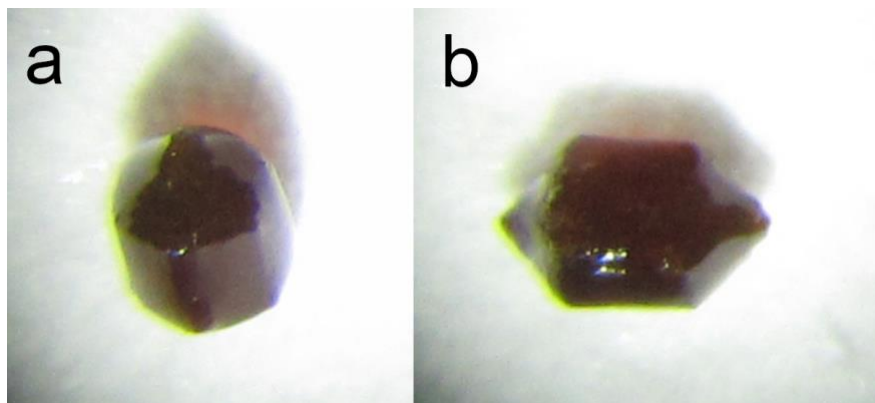

**Figure S2.** Optical images for a single crystal of **2-(R)** along two orientations (a and b).

## Magnetic Properties

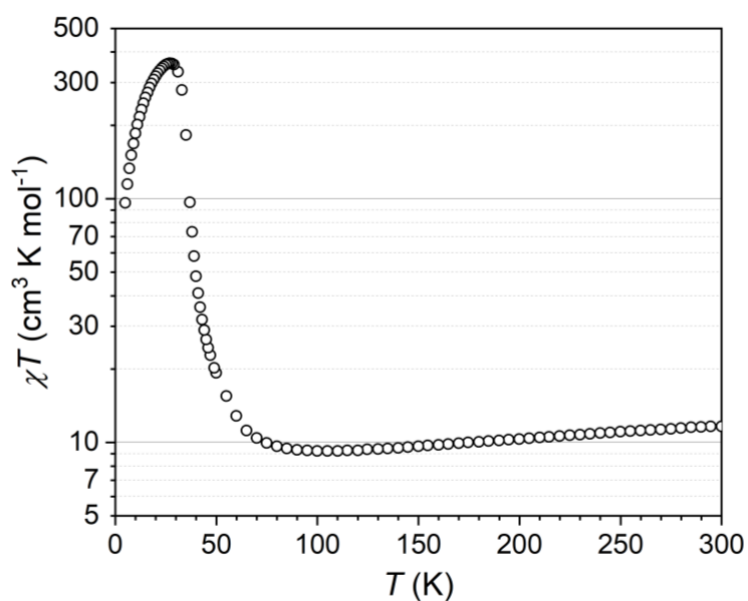

**Figure S3.** Temperature variation (4.0-300 K range) of the molar magnetic susceptibility times the temperature ( $\chi T$ ,  $\text{cm}^3 \text{ K mol}^{-1}$ ) for a microcrystalline sample of **2-(R)** under an applied static magnetic field  $B$  of 0.1 T. The minimum at ca. 75 K in the  $\chi T$  versus  $T$  plot followed by a sudden increase of  $\chi T$  is indicative of the ferrimagnetic ordering in **2**.

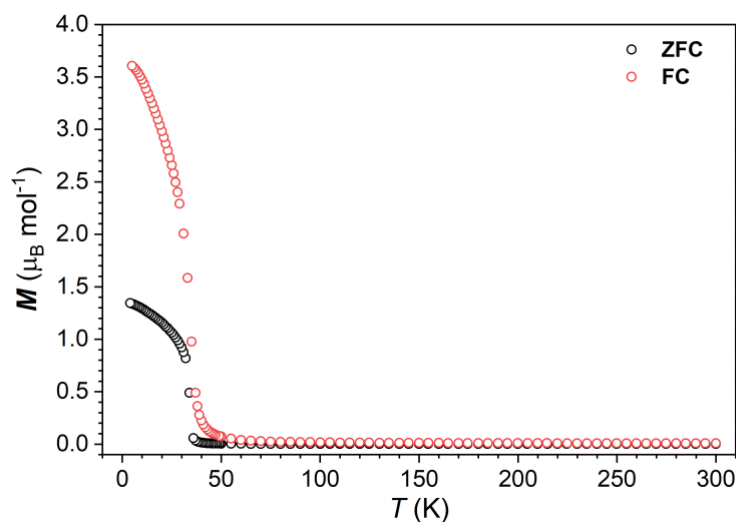

**Figure S4.** Zero-field-cooled (ZFC) and field cooled (FC) ( $B = 0.1$  T) magnetization data,  $M$  ( $\text{cm}^3 \text{ mol}^{-1}$ ), versus temperature (4.0-300 K range) for a microcrystalline sample of **2-(R)**. The divergence of the ZFC-FC curves at ca. 35 K is indicative of the magnetic ordering temperature of the material.
